**CORRECTION**

# Adjustments of global and local hindlimb properties during the terrestrial locomotion of the common quail (*Coturnix coturnix*)

Emanuel Andrada, John A. Nyakatura, Florian Bergmann and Reinhard Blickhan

There was an error published in *J. Exp. Biol.* **216**, pp. 3906-3916.

In Fig. 7, the mean values of the joint torques in the middle and the right column were erroneously displayed as  $\text{Nm BW}^{-1}$ . The units should have been  $\text{Nm kg}^{-1}$ . The correct figure is printed below.

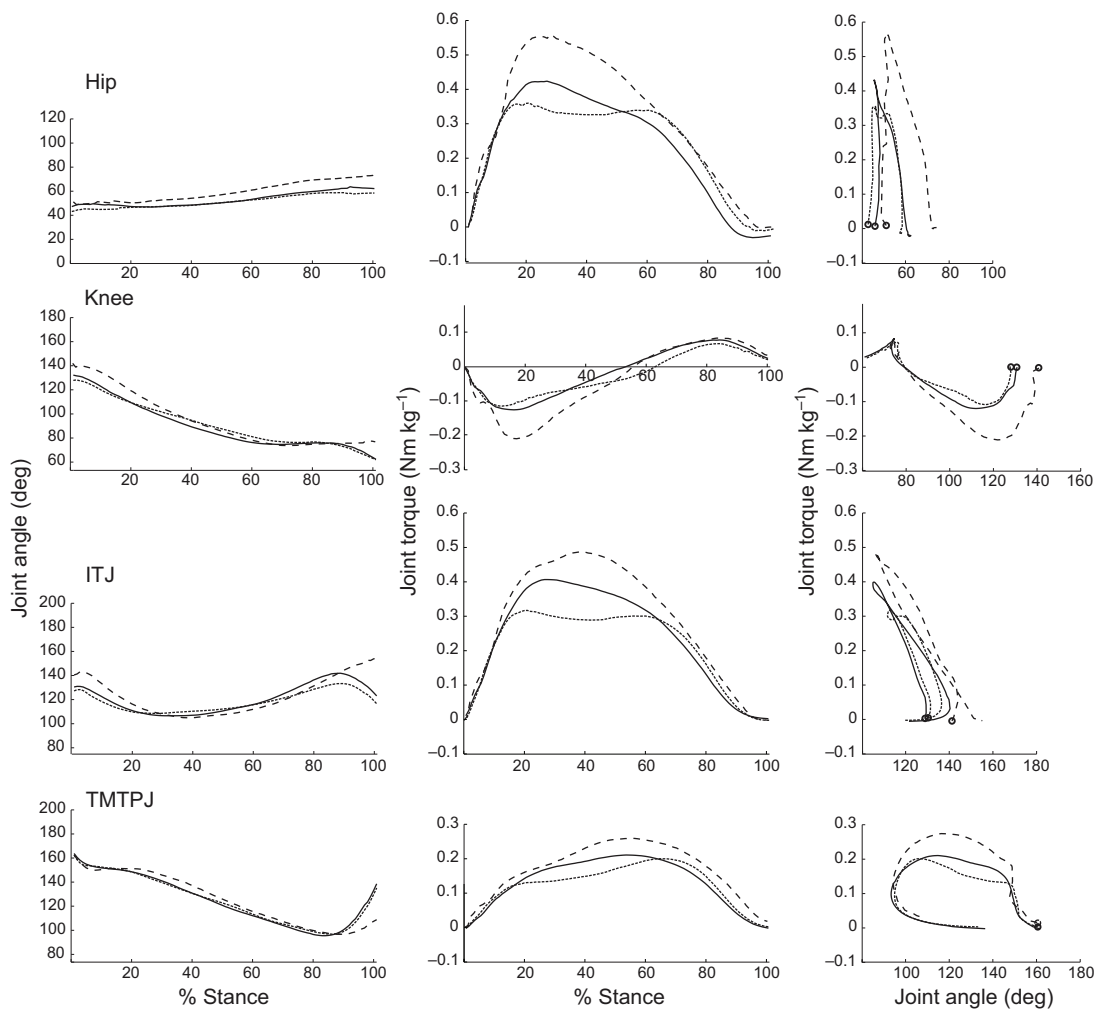

Fig. 7. Local leg parameters (joint mechanics) during terrestrial locomotion of the quail (walking, dotted line; grounded running, solid line; running, dashed line). Joint angles (left), joint torques (middle) and torque–angle plots (right) over the course of the stance for the hip, knee, ITJ and TMTJ. Displayed are mean values (walking, 32 strides; grounded running, 34 strides; running, eight strides). Increasing joint angles indicate extension, and positive values in the torque plots represent extensor torques. Circles indicate touch-down.

We apologise to readers for any inconvenience that this error may have caused.
